# Supplementary material
Source: PubMed Central journal article supplement (PMC8791312)
Supplement: KID.0005802020SupplementaryData.pdf [file KID.0005802020SupplementaryData.pdf]

## Supplemental Table and Figures:

Supplemental Table 1. Association of concordant and discordant performance-based functional assessments and outcomes

|                                          | <u>Discordant</u>             |                               |                | <u>Concordant</u>              |                              |                |
|------------------------------------------|-------------------------------|-------------------------------|----------------|--------------------------------|------------------------------|----------------|
|                                          | SPPB High<br>M3SE Low         | SPPB Low<br>M3SE High         | p-value        | SPPB High<br>M3SE High         | SPPB Low<br>M3SE Low         | p-value        |
| <b>Participants</b> n (% of 350)         | 81 (23.1)                     | 61 (17.4)                     | --             | 116 (33.1)                     | 92 (26.3)                    | --             |
| <b>ESKD</b> n (% of group)               | 7 (8.6)                       | 8 (13.1)                      | 0.417          | 13 (11.2)                      | 13 (14.1)                    | 0.554          |
| <b>Death</b>                             | 9 (11.1)                      | 9 (14.8)                      | 0.546          | 11 (9.5)                       | 27 (29.3)**                  | 0.0009         |
| <b>ESKD or 50% reduction GFR</b>         | 8 (9.8)                       | 13 (21.3)                     | 0.794          | 13 (11.2)                      | 18 (19.6)                    | 0.121          |
| <b>ESKD, 50% reduction GFR, or death</b> | 17 (21.0)                     | 21 (34.4)                     | 0.125          | 24 (20.7)                      | 44 (47.8)**                  | 0.0007         |
|                                          | <u>IADL High<br/>M3SE Low</u> | <u>IADL Low<br/>M3SE High</u> | <u>p-value</u> | <u>IADL High<br/>M3SE High</u> | <u>IADL Low<br/>M3SE Low</u> | <u>p-value</u> |
| <b>Participants</b> n (% of 350)         | 106 (30.3)                    | 37 (10.6)                     | --             | 140 (40.0)                     | 67 (19.1)                    | --             |
| <b>ESKD</b> n (% of group)               | 14 (13.2)                     | 3 (8.1)                       | 0.439          | 18 (12.9)                      | 6 (9.0)                      | 0.441          |
| <b>Death</b>                             | 16 (15.1)                     | 4 (10.8)                      | 0.549          | 16 (11.4)                      | 20 (29.9)**                  | 0.003          |
| <b>ESKD or 50% reduction GFR</b>         | 19 (17.9)                     | 3 (8.1)                       | 0.19           | 23 (16.4)                      | 7 (10.4)                     | 0.29           |
| <b>ESKD, 50% reduction GFR, or death</b> | 34 (32.1)                     | 7 (18.9)                      | 0.198          | 38 (27.1)                      | 27 (40.3)                    | 0.114          |
|                                          | <u>SPPB High<br/>IADL Low</u> | <u>SPPB Low<br/>IADL High</u> | <u>p-value</u> | <u>SPPB High<br/>IADL High</u> | <u>SPPB Low<br/>IADL Low</u> | <u>p-value</u> |
| <b>Participants</b> n (% of 350)         | 34 (9.7)                      | 83 (23.7)                     | --             | 163 (46.6)                     | 70 (20.0)                    | --             |
| <b>ESKD</b> n (% of group)               | 3 (8.8)                       | 15 (18.1)                     | 0.249          | 17 (10.4)                      | 6 (8.6)                      | 0.679          |
| <b>Death</b>                             | 4 (11.8)                      | 16 (19.3)                     | 0.372          | 16 (9.8)                       | 20 (28.6)**                  | 0.00084        |
| <b>ESKD or 50% reduction GFR</b>         | 3 (8.8)                       | 24 (28.9)*                    | 0.04           | 18 (11.0)                      | 7 (10.0)                     | 0.824          |
| <b>ESKD, 50% reduction GFR, or death</b> | 7 (20.6)                      | 38 (45.8)*                    | 0.046          | 34 (20.9)                      | 27 (38.6)*                   | 0.0154         |

Note: P-values compares two groups listed side by side

\* indicates significance  $p \leq 0.05$

\*\* indicates significance  $p \leq 0.001$

Supplemental Table 2. "Performance-based Functional Assessment Hazard Ratios accounting for competing risk of death, ESKD or 50% decline GFR"

|               | Death              |                       | ESKD or 50% Decline GFR |                       |
|---------------|--------------------|-----------------------|-------------------------|-----------------------|
|               | CPH                | FG                    | CPH                     | FG                    |
| SPPB          | 2.43 (1.36-4.34)   | 2.403 (1.397 - 4.134) | 1.36 (0.72 – 2.55)      | 1.197 (0.589 - 2.433) |
| M3SE          | 1.49 (0.80 – 2.77) | 1.429 (0.809 - 2.523) | 1.03 (0.55 – 1.93)      | 0.963 (0.510 - 1.819) |
| IADL          | 1.71 (0.97 – 2.99) | 1.747 (1.028 - 2.968) | 0.49 (0.24-1.00)        | 0.426 (0.198 – 0.918) |
| Summary Score | 2.07 (1.16-3.69)   | 2.052 (1.243 - 3.387) | 0.85 (0.46 – 1.59)      | 0.734 (0.384 - 1.405) |

CPH = Cox Proportional Hazard

FG = Fine and Gray



Supplemental Figure 1. ESKD

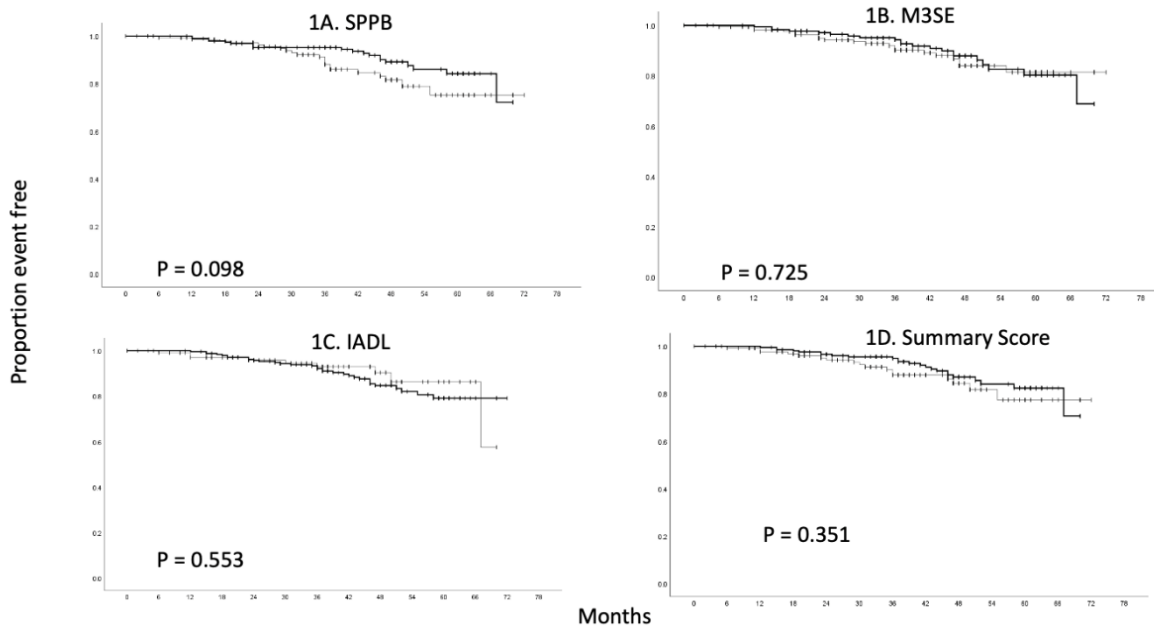

Supplemental Figure 2. ESKD or 50% decline GFR

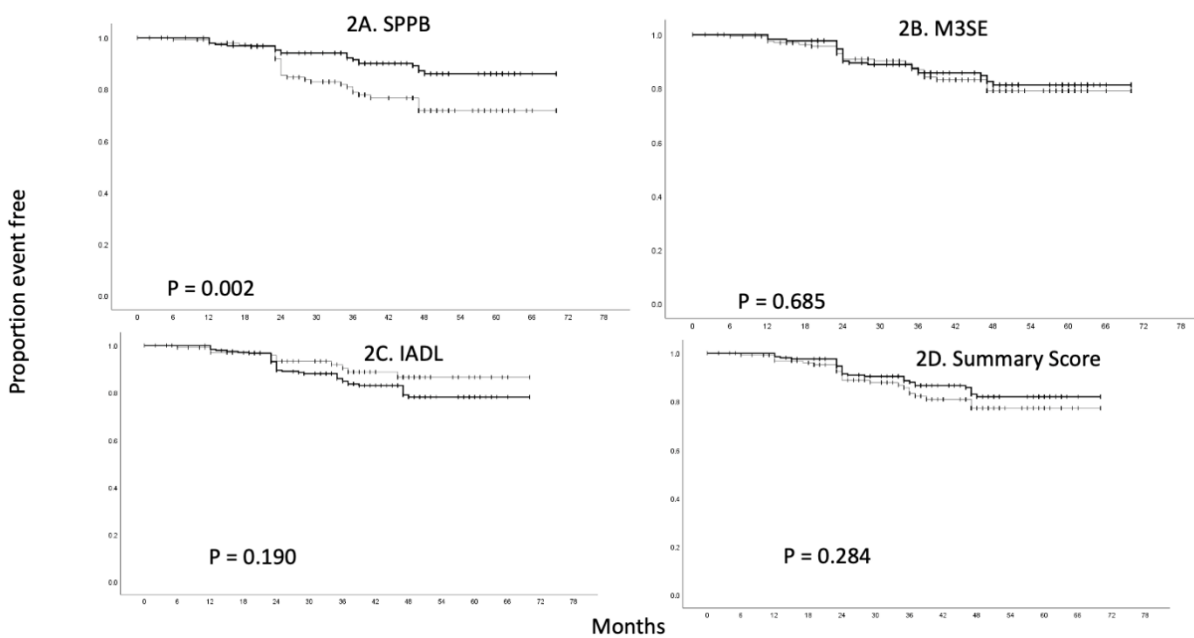

### Supplemental Figure Legend

**Figures 1-2:** Kaplan-Meier plots of high performance (bolded line) versus low performance groups (non-bolded line) for (A) SPPB, (B) M3SE, (C) IADL, and (D) Summary Score for outcomes of (1) end-stage kidney disease; (2) 50% reduction in GFR or ESKD. Log-rank statistic p-value.
